# Supplementary material for: Association of Sequence types, Antimicrobial Resistance and Virulence Genes in India isolates of Klebsiella pneumoniae: A Comparative Genomics Study
Source: Research Square preprint supplement (doi:10.21203/rs.3.rs-923160/v3), 2021-09-25
Supplement: Supplementary file 1 [file bf35c6b8910260b939f1cb03.xlsx]

## Sheet: Sheet1
		AMR genes				Virulence gene
Strains	blaCTX-M-15	blaTEM-1B	blaOXA-232	iutA	allS	rmpA	entB	ybtS	magA
876
926
936
938
162CAM
231CHI
242CHI
27CAM
35DN
4DN
55DN
61CAM
76CHI
80CAM
86AS
8AS
AWD5
B-16340
B1647
B16470
B20143
B2481
B32205
B35725
B3639
B3789
B6753
B7868
BA10334
BA10835
BA11905
BA12818
BA12949
BA1559
BA1602
BA1625
BA17341
BA17989
BA18015
BA18029
BA20038
BA20567
BA20978
BA2105
BA2275
BA23183
BA24670
BA24831
BA253
BA25425
BA25665
BA27935
BA28088
BA28118
BA2817
BA28434
BA2908
BA29256
BA31746
BA32040
BA33560
BA33875
BA34918
BA34974
BA3635
BA36541
BA36749
BA37082
BA37787
BA38014
BA39576
BA39649
BA39824
BA39950
BA4072
BA41763
BA4393
BA4439
BA4656
BA6008
BA6378
BA6464
BA9344
BP10616
BP11474
BP1722
BP19430
BP19451
BP327
BP3636
BP5065
BP737
C1
C12
C4
C6
C7
C8
CMC_VB13923
CMC_VB344444
CMC_VB35168
CMC_VB4175
CMC_VB5505
CMC_VB6753
CRKP1
EGD-HP19
EN5153
EN5199
EN5218
EN5275
EN5339
H53
H62
HPCN17
HPCN22
HPCN5
IR27
JNM10C3
JNM8C2
KBG6.2
KP26
KPF39
KpIMS38
ME30
MRK9
P-7335
PL1-RCS238
PM10818
PM11304
PM1134
PM1168
PM12530
PM12640
PM138
PM1842
PM1995
PM5070
PM5186
PM565
PM7109
PM716
PM9016
PMM475
PVN-1
U25
VB1347
VBA2612
VBA3720
VBA6949
VBNK2
VBNK3
VBNK6
VBP1492
